# Supplementary material
Source: Springer Nature journal article supplement (https://www.springermedizin.de/resource/supplementary/12874_2006_180_MOESM1_ESM.pdf/9433938)
Supplement: MOESM1 [file 9433938]

Records of reviews (& protocols) identified as relevant to health promotion and public health identified and screened for retrieval:  
n = 186 (162)

Records of reviews (& protocols) excluded because the corresponding review did not include economics references:  
n = 164 (155)

Records of reviews (& protocols) retrieved for more detailed evaluation:  
n = 22 (7)

Records of reviews (& protocols) excluded because the corresponding review has been withdrawn from the Cochrane Library:  
n = 1 (0)

Records of reviews (& protocols) with usable information:  
n = 21 (7)
